# Supplementary material for: HIV-1 Env trimer opens through an asymmetric intermediate in which individual protomers adopt distinct conformations
Source: eLife journal article supplement (doi:10.7554/elife.34271), 2018-03-21

# HIV-1<sub>BG505</sub>

State 1- State 2

State 2- State 1

State 2- State 3

State 3- State 2

## A Unliganded

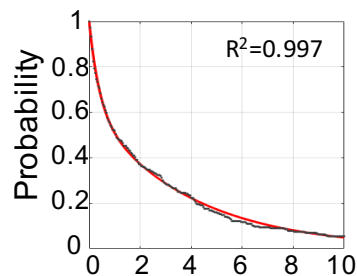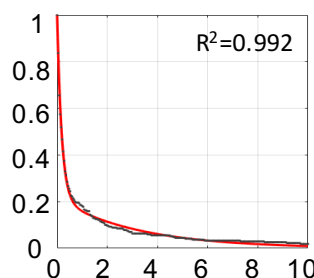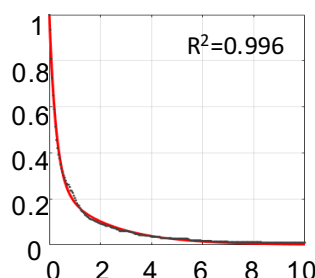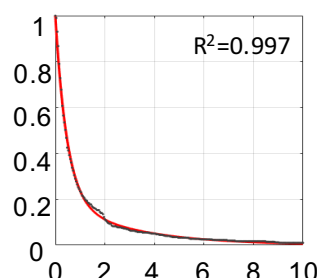

## B sCD4

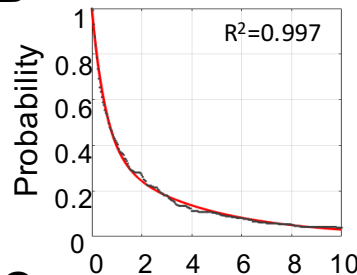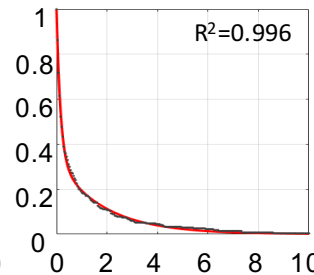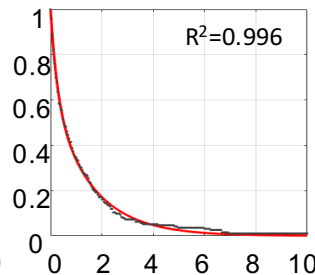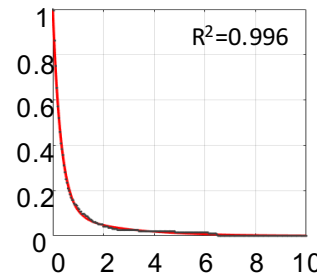

## C sCD4<sub>D1D2</sub>-Igatp

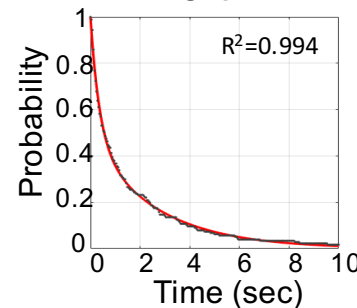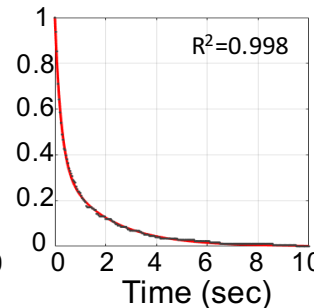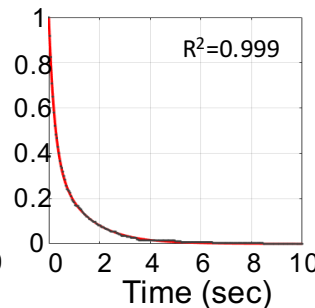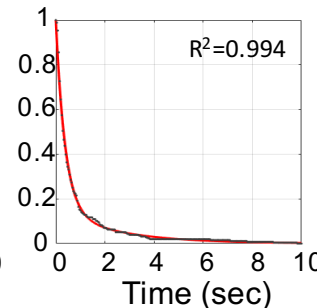

Supplement: supp [file elife-34271-supp-v1.zip]
