# Supplementary material for: HIV-1 Env trimer opens through an asymmetric intermediate in which individual protomers adopt distinct conformations
Source: eLife journal article supplement (doi:10.7554/elife.34271), 2018-03-21
Supplement: supp [file elife-34271-supp-v1.zip]

Archive with 12 entries (12 files):
- elife_poa_e34271_Figure_3_figure_supplement_1.pdf
- elife_poa_e34271_Figure_2_figure_supplement_2.pdf
- elife_poa_e34271_Figure_2_figure_supplement_3.pdf
- elife_poa_e34271_Transparent_Reporting_File.docx
- elife_poa_e34271_Figure_1_figure_supplement_1.pdf
- elife_poa_e34271_Figure_4_figure_supplement_1.pdf
- elife_poa_e34271_Figure_4_figure_supplement_2.pdf
- elife_poa_e34271_Figure_4_figure_supplement_3.pdf
- elife_poa_e34271_Figure_1_figure_supplement_3.pdf
- elife_poa_e34271_Figure_2_figure_supplement_1.pdf
- elife_poa_e34271_Figure_1_figure_supplement_2.pdf
- elife_poa_e34271_Figure_1_figure_supplement_4.pdf
