# Supplementary material for: HIV-1 Env trimer opens through an asymmetric intermediate in which individual protomers adopt distinct conformations
Source: eLife journal article supplement (doi:10.7554/elife.34271), 2018-03-21
Supplement: supp [file elife-34271-supp-v1.zip › elife_poa_e34271_Figure_1_figure_supplement_1.pdf]

## V1 LOOP

136

|            |                                                              |
|------------|--------------------------------------------------------------|
| NL4-3      | CVKLTPLCVSLKCTDLKND-----TNTNSSSSGRMIMEKGEIKNC SFNIS          |
| NL4-3 V1Q3 | CVKLTPLCVSLKCTDLKN <b>GQQQLG</b> TNTNSSSSGRMIMEKGEIKNC SFNIS |
| JR-FL      | CVKLTPLCVTLNCKDV-N-----ATNTTNDSEGTMERGEIKNC SFNIT            |
| JR-FL V1Q3 | CVKLTPLCVTLNCKD--- <b>GQQQLG</b> TNTTNDSEGTMERGEIKNC SFNIT   |
| BG505      | CVKLTPLCVTLQCTNV-----TNNITDD----M-RGELKNC SFNMT              |
| BG505 V1Q3 | CVKLTPLCVTLQCTNV-- <b>GQQQLG</b> TNNITDD----M-RGELKNC SFNMT  |

## V4 LOOP

400

|            |                                                    |
|------------|----------------------------------------------------|
| NL4-3      | F--NSTW-FNSTW-----STEGSNNTEGSD                     |
| NL4-3 V4A1 | F--NSTW-FNSTW---- <b>GDSLDMLEWSLM</b> STEGSNNTEGSD |
| JR-FL      | FYCNSTQLFNSTWNNN-----TEGSNNTEGNT                   |
| JR-FL V4A1 | FYCNSTQLFNSTWNNN- <b>GDSLDMLEWSLM</b> -TEGSNNTEGNT |
| BG505      | FYCNTSGLFNSTWISNT-----SVQGSNSTGSND                 |
| BG505 V4A1 | FYCNTSGLFNSTWISNT <b>GDSLDMLEWSLM</b> SVQGSNSTGSND |
