# Supplementary material for: HIV-1 Env trimer opens through an asymmetric intermediate in which individual protomers adopt distinct conformations
Source: eLife journal article supplement (doi:10.7554/elife.34271), 2018-03-21

# HIV-1<sub>NL4-3</sub>

State 1- State 2

State 2- State 1

State 2- State 3

State 3- State 2

**A** Unliganded

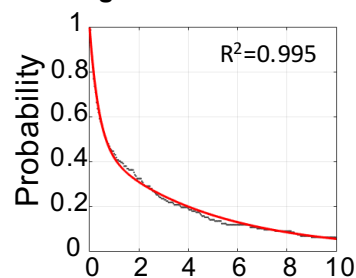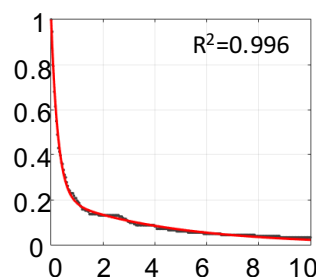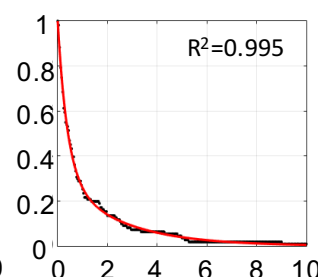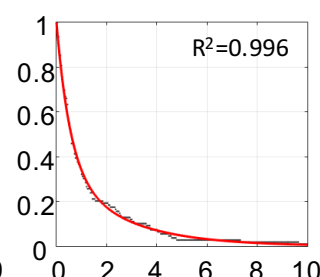

**B** sCD4

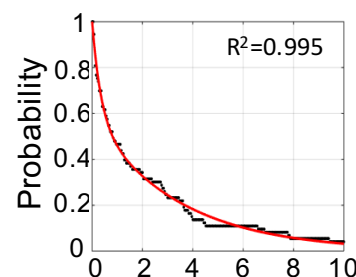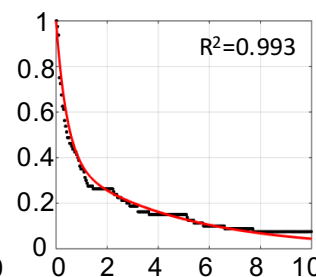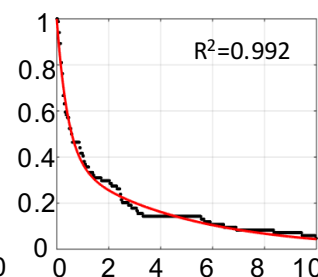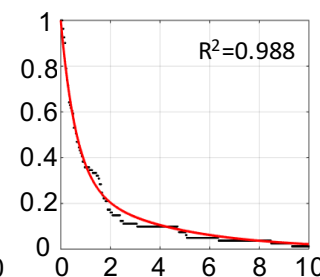

**C** sCD4<sub>D1D2</sub>-IgGatp

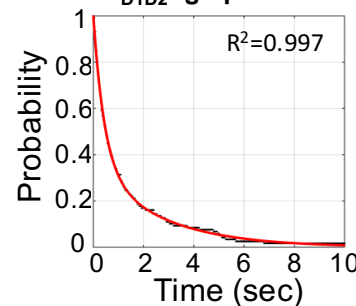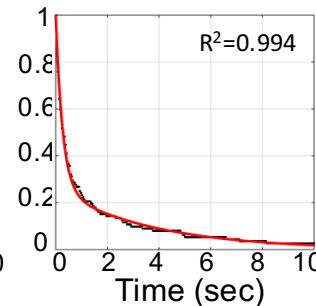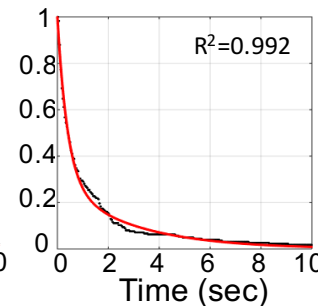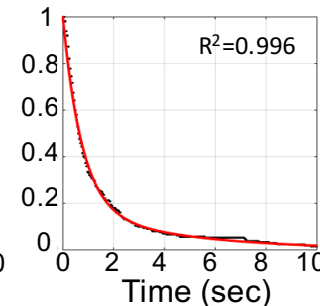

Supplement: supp [file elife-34271-supp-v1.zip › elife_poa_e34271_Figure_4_figure_supplement_1.pdf]
