# Supplementary figures and images for: HIV-1 Env trimer opens through an asymmetric intermediate in which individual protomers adopt distinct conformations
Source: eLife journal article supplement (doi:10.7554/elife.34271), 2018-03-21

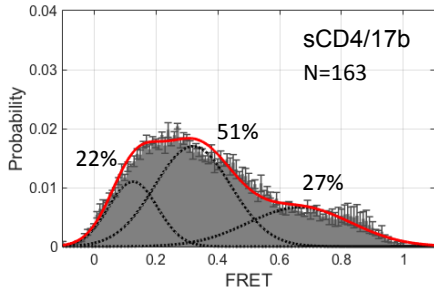

Supplement: supp [file elife-34271-supp-v1.zip]

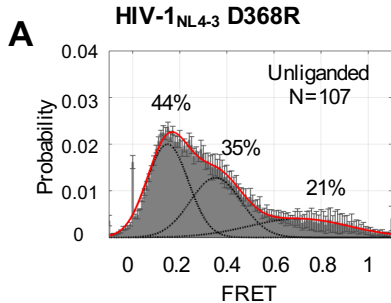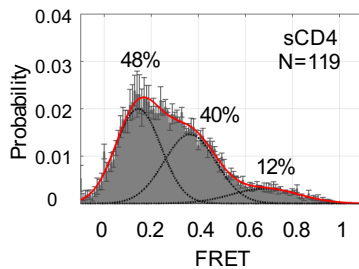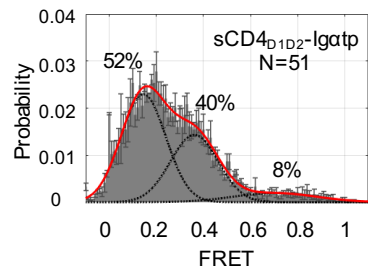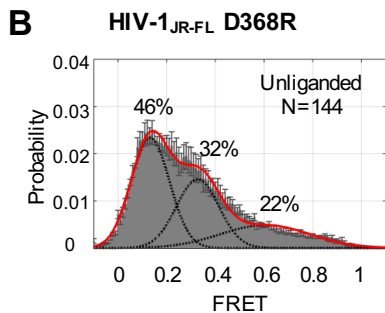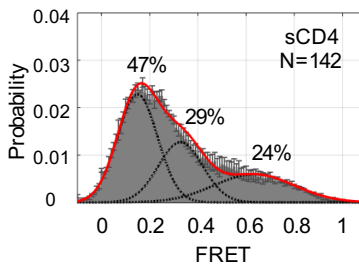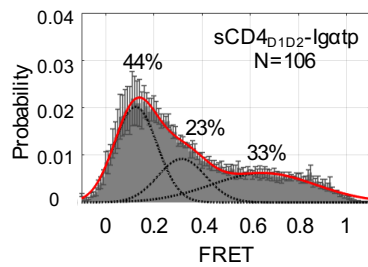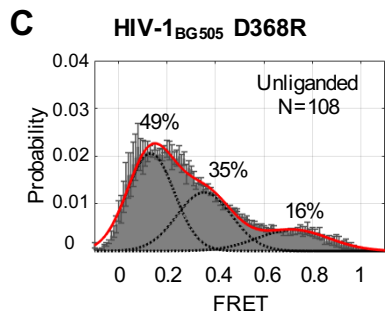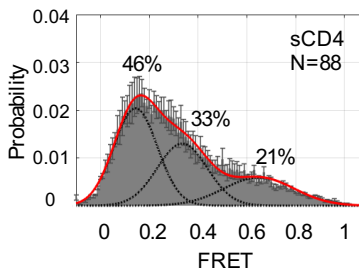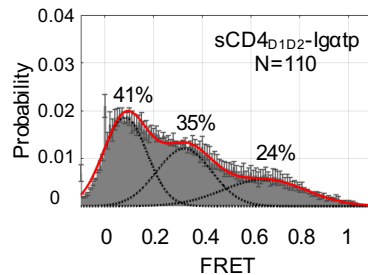

Supplement: supp [file elife-34271-supp-v1.zip]

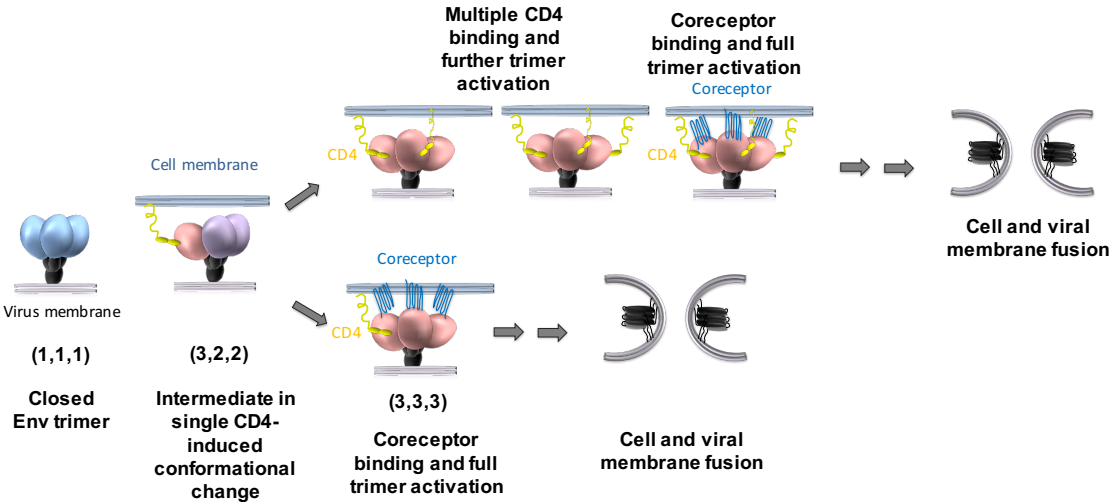

Supplement: supp [file elife-34271-supp-v1.zip]

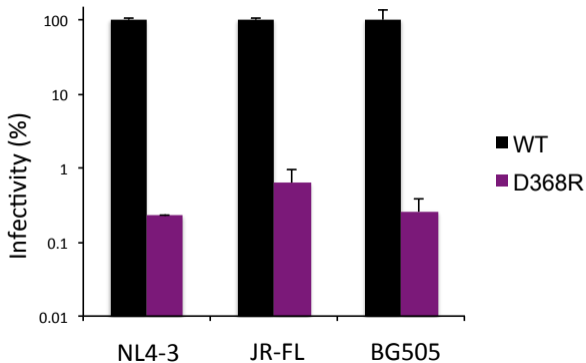

Supplement: supp [file elife-34271-supp-v1.zip › elife_poa_e34271_Figure_2_figure_supplement_2.pdf]

**A**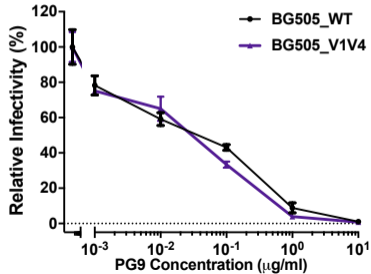**B**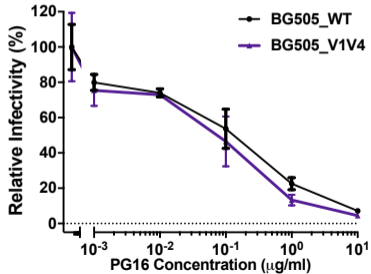

Supplement: supp [file elife-34271-supp-v1.zip › elife_poa_e34271_Figure_1_figure_supplement_3.pdf]

*NL4-3 WT*  
*NL4-3 D368R*

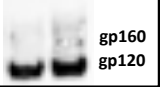

*JR-FL WT*  
*JR-FL D368R*

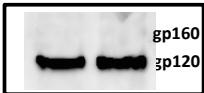

*BG505 WT*  
*BG505 D368R*

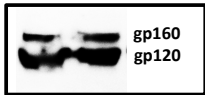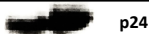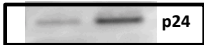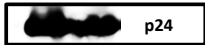

Supplement: supp [file elife-34271-supp-v1.zip › elife_poa_e34271_Figure_2_figure_supplement_1.pdf]

**A**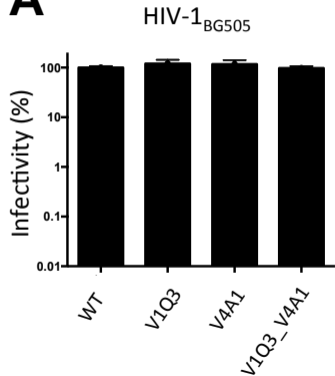**B**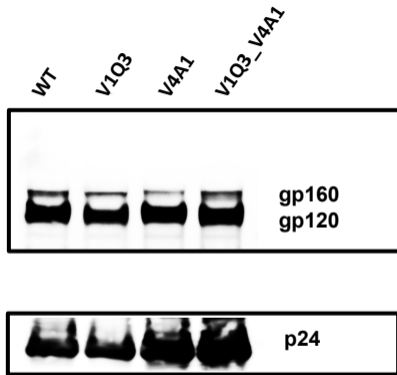

Supplement: supp [file elife-34271-supp-v1.zip › elife_poa_e34271_Figure_1_figure_supplement_2.pdf]
